**A-217 Room C, 10/17/2000 2:00 PM - 4:00 PM (PS)**  
**Reversibility of Myocardial Molecular Remodeling in Human Heart Failure** P.M. Heerdt, MD, PhD; A. The, BA; M. Schlame, MD, Anesthesiology, Cornell University, New York, NY, United States. The study demonstrated disease-specific reverse molecular remodeling of the mitochondria and sarcoplasmic reticulum in LVAD-supported hearts broadly categorized as ischemic or dilated cardiomyopathy.

**A-218 Room C, 10/17/2000 2:00 PM - 4:00 PM (PS)**  
**Atrial Fibrillation after CABG Surgery Is Unrelated to Pre-Existing Cardiac Structural or Functional Abnormalities** Charles W. Hogue, Jr., M.D.; Nikolaos J. Skubas, M.D., Anesthesiology, Washington University School of Medicine, St. Louis, MO, United States. Cardiac structure and functional abnormalities do not appear prevalent in patients developing atrial fibrillation after CABG surgery.

**A-219 Room C, 10/17/2000 2:00 PM - 4:00 PM (PS)**  
**Hyperprocalcitonemia Is Related to Non-Infectious Postoperative Severe SIRS Associated with Coronary Artery Bypass Grafting** Francois Kerbaul, MD; Catherine Guidon, MD; Muriel Molot, MD; Thierry Mesana, MD, PHD; Francois Gouin, MD, PHD, Departments of Anesthesia and Cardiac Surgery, Timone Hospital, Marseille, France. PCT is a marker of postoperative severe SIRS after cardiac surgery.

**A-220 Room C, 10/17/2000 2:00 PM - 4:00 PM (PS)**  
**Coronary Subclavian Steal Syndrome (CSSS) in Patients Undergoing Noncardiac Surgery** K.B. Kern, MD; J.E. Bauder-Heidt, RN; L.G. Hughes, RN; C.A. Sulek, MD; E.B. Lobato, MD, Department of Anesthesiology, Univ. of Fla. and VAMC, Gainesville, FL, United States. CSSS is relatively common in patients with post CABG angina, and should routinely be included in the differential diagnosis.

**A-221 Room C, 10/17/2000 2:00 PM - 4:00 PM (PS)**  
**Oral Treatment with Nicorandil(N) Prior to Coronary Artery Bypass Graft Surgery (CABGS)** Jean-Jacques Lebot, MD, PhD; Pascale Blanc, MD; Helene Bouvier, MD; Claude Girard, MD, PhD; Michel Ovize, MD, PhD, Anesthesiology, Hopital L. Pradel, Lyon, France. Perioperative hypotension has been reported after N treatment. In this randomized study, no deleterious hemodynamic effect of N was reported.

**A-222 Room C, 10/17/2000 2:00 PM - 4:00 PM (PS)**  
**Morphine Activates  $K_{ATP}$  Channels and Reduces Ischemia Reperfusion Injury in Cultured Myocytes** Bradley C. McPherson, BA; Zuobui Shao, MD; Lance B. Becker, MD; Solomon Aronson, MD; Zhenbai Yao, MD, PhD, Department of Anesthesia and Critical Care, The University of Chicago, Chicago, IL, United States. Opioid receptor activation and  $K_{ATP}$  channel opening decrease free radical production during reperfusion.

**A-223 Room C, 10/17/2000 2:00 PM - 4:00 PM (PS)**  
**The Relationship between Laryngoscopic Attempts and Airway Complications: Should We Limit Attempts to 3 during Emergency Intubation?** Thomas C. Mort, MD; Ricardo Gotay, MD, Anesthesiology, Hartford Hospital, UCONN, Hartford, CT, United States. A direct relationship exists between the number of intubation attempts during emergency intubation in the remote location and critical airway events.

**A-224 Room C, 10/17/2000 2:00 PM - 4:00 PM (PS)**  
**Prolonged Suppression of the Hypothalamic-Pituitary-Thyroid Axis after Cardiac Surgery** Yoshiyuki Naito, M.D.; Sboji Arisawa, M.D.; Hiromasa Kobayashi, M.D.; Michihiro Nasu, M.D., Department of Anesthesia, Kobe City General Hospital, Kobe, Japan. A detailed analysis of the hypothalamic-pituitary-thyroid function revealed that low T3 syndrome continued for 5 days after uncomplicated CABG.

**A-225 Room C, 10/17/2000 2:00 PM - 4:00 PM (PS)**  
**Delineation of Peripheral Vasomotor Activity during Extracorporeal Circulation** Mibai Podgoreanu, M.D.; Robert G. Stout, M.D.; Elie M. Ferneini, M.H.S.; Ashraf Gboshay, M.D.; David G. Silverman, M.D., Anesthesiology, Yale University School of Medicine, New Haven, CT, United States. This study documented the presence of peripheral vasomotor activity during cardiopulmonary bypass.

**A-226 Room C, 10/17/2000 2:00 PM - 4:00 PM (PS)**  
**NF- $\kappa$ B Activation Is a Possible Mechanism for Proinflammatory Cytokines Release in Trauma Patients** Tetsuhiro Sakai, MD; Gary E. Hill, MD; Akira Kudoh, MD; Akitomo Matsuki, MD; Charles W. Whitten, MD, Department of Anesthesiology, University of Hiroaki, Hiroaki, Aomori, Japan. Trauma induce a synthesis and release of IL-6 depend on the magnitudes of the trauma by activation of NF- $\kappa$ B.

**A-227 Room C, 10/17/2000 2:00 PM - 4:00 PM (PS)**  
**A Comparison of Equipotent Doses of Dopamine, Dobutamine or Dopexamine on Prolactin Release in High Risk Surgical Patients** Thomas Schilling, M.D.; Matthias Grundling, M.D.; Klaus-Uwe Moritz, M.A., Ph.D.; Thomas Hachenberg, M.D., Ph.D.; Michael Wendt, M.D., Ph.D., Dept. of Anesthesiology, Ernst-Moritz-Arnt-University, Greifswald, Germany. DX and DO had no effects on serum prolactin, DA suppressed prolactin release.

**A-228 Room C, 10/17/2000 2:00 PM - 4:00 PM (PS)**  
**Phenylephrine Increases Blood Flow in Grafted Radial Artery Used in Coronary Artery Bypass Surgery** Nikolaos J. Skubas, MD; Hendrik B. Barner, MD; Ioanna Apostolidou, MD; Demetrios G. Lappas, MD, Anesthesiology, Washington University in Saint Louis, Saint Louis, MO, United States. Phenylephrine increased grafted radial artery blood flow in CABG surgery.

**A-229 Room C, 10/17/2000 2:00 PM - 4:00 PM (PS)**  
**Dose Responsiveness to Inhaled Nitric Oxide Therapy in Adult Cardiac Surgery Patients** Alann R. Solina, MD; Steven H. Ginsberg, MD; Denes Papp, MD; Tyrone Krause, MD; William Grubb, MD, Anesthesiology, UMDNJ-Robert Wood Johnson Medical School, New Brunswick, NJ, United States. NO doses greater than 10 PPM are not associated with greater reductions in PVR in adult cardiac surgery patients.

**A-230 Room C, 10/17/2000 2:00 PM - 4:00 PM (PS)**  
**Postoperative Myocardial Ischemia Is Associated with Nitric Oxide Depletion** Claudia D. Spies, MD; Hartmut Kern, MD; Jochem Grosse, MD; Wolfgang J. Kox, MD, Anesthesiology and Intensive Care, Charite, HU, Berlin, Germany. Postoperative myocardial ischemia in patients with major surgery was associated with decreased levels of NO.
